# Supplementary material
Source: PubMed Central journal article supplement (PMC8792973)
Supplement: NIHMS1770929-supplement-Supplemental_eFigure.pdf [file NIHMS1770929-supplement-Supplemental_eFigure.pdf]

## Supplemental Online Content

Kaunitz AM, Kapoor E, Faubion S. Treatment of women after bilateral salpingo-oophorectomy performed prior to natural menopause. *JAMA*. doi:10.1001/jama.2021.3305

**eFigure.** Treatment of Women after Bilateral Salpingo-oophorectomy Performed Prior to Natural Menopause

This supplemental material has been provided by the authors to give readers additional information about their work.

Treatment of women after bilateral salpingo-oophorectomy (BSO) performed prior to natural menopause\*

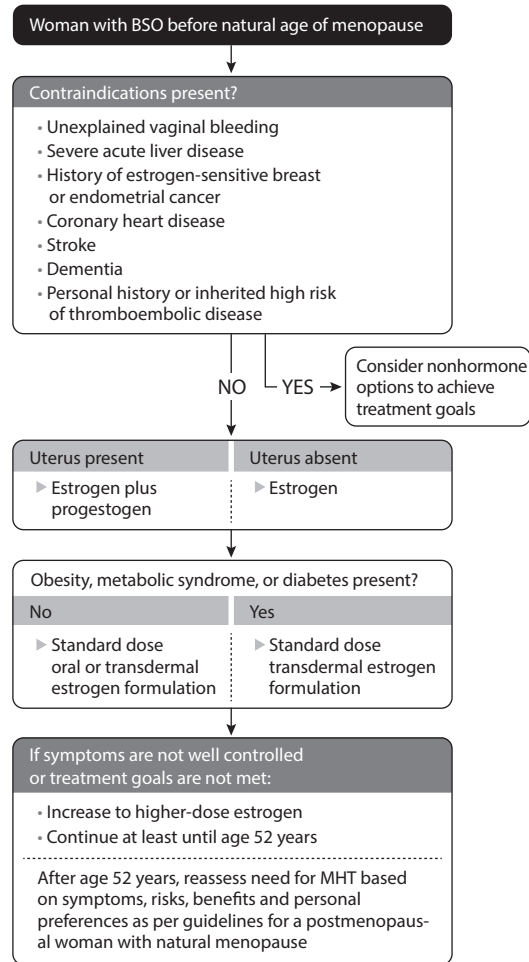

\* Recommendations based on expert opinion
